# Supplementary material
Source: HighWire-hosted journal article supplement (https://www.genetics.org/content/suppl/2010/09/28/genetics.110.123174)
Supplement: FigureS8.pdf [file FigureS8.pdf]

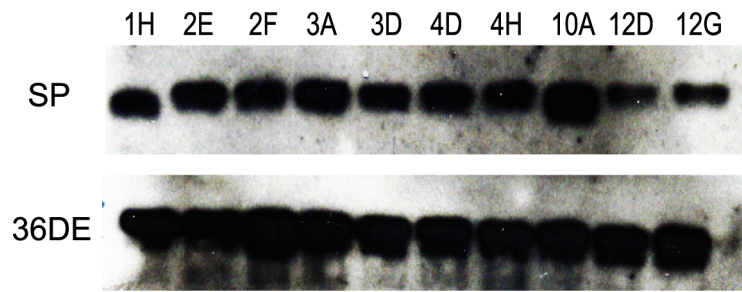

FIGURE S8.—Western analysis of SP protein levels. Males from each chromosome 3 extraction line were evaluated for SP protein levels. Acp36DE is a loading control.
